# Supplementary material
Source: publisher figshare collection journal article supplement (https://frontiersin.figshare.com/ndownloader/files/30681041)
Supplement: Supplementary file [file 30681041]

| Tissue type             | Age (y) | Sex | BMI (kg/m <sup>2</sup> ) | PMI (h) | Cause of death             | Comorbidities           |
|-------------------------|---------|-----|--------------------------|---------|----------------------------|-------------------------|
| Normal #1               | 62      | M   | 24.5                     | 3       | Congestive heart failure   | Alcoholism              |
| Normal #2               | 68      | M   | 24.5                     | 5       | Necrotic colitis           | Coronary artery disease |
| Normal #3               | 52      | M   | 27.7                     | 4.5     | Gastric perforation        | Thyroid nodule          |
| Normal #4               | 50      | M   | 35.4                     | 4       | Acute coronary syndrome    | Atherosclerosis         |
| Diabetic nephropathy #1 | 62      | M   | 26.3                     | 3       | Rupture of aortic aneurism | Atherosclerosis         |
| Diabetic nephropathy #2 | 48      | M   | 50.5                     | 4       | Gastric perforation        | Metabolic syndrome      |
| Diabetic nephropathy #3 | 56      | F   | 27.7                     | 5.5     | Stroke                     | Atherosclerosis         |
| Diabetic nephropathy #4 | 90      | M   | 24.8                     | 3       | Congestive heart failure   | Hypertension            |

**SUPPLEMENTAL TABLE 1** | Clinical information of human kidney samples used for the histological examination. The patients' pathological diagnosis, age at the time of death, sex, BMI, PMI, cause of death, and comorbidities are shown. BMI, body mass index; PMI, postmortem interval.
